# Supplementary material
Source: publisher site journal article supplement (https://www.dovepress.com/article/424152)
Supplement: Supplementary file 1 [file get_supplementary_file.php]

## Supplementary material

**Table S1 - Co-treatments of interest in patients under Bx/TSD classified in one disease**

| **Disease** | **AD**  **n=3,981** | **CRSwNP**  **n=333** | **SA**  **n=12,889** | **CSU**  **N=2,681** |
| --- | --- | --- | --- | --- |
| Co-treatments*,° (%) | I**mmunosuppressants**  Ciclosporin: 5.8  Methotrexate: 6.2  **Cutaneous treatment**  Alitretinoin: 0.7  Clobetasone: 25.7  Corticoids: 66.8  Emollient: 17.8  Fusidic acid: 2.0  Topic tacrolimus: 23.3 | **Inhaled treatment**  LABA/LAMA/ICS: 2.1  ICS/LABA: 47.1  ICS: 33.3  LABA: 1.5  LAMA: 6.9  ≥1 whatever the type: 140**  **Corticosteroids**  Nasal: 33.0  Oral: 66.4 | **Inhaled treatment**  LABA/LAMA/ICS: 9.0  ICS/LABA: 81.2  ICS: 18.7  LABA: 4.9  LAMA: 50.4  ≥1 whatever the type: 166**  **Corticosteroids**  Nasal: 13.3  Oral: 58.7  **Others treatments**  Montelukast: 41.1  Theophylline: 1.6 | **Corticosteroids**  Oral: 27.6  Nasal: 33.0 |

AD: atopic dermatitis, ATC: anatomical therapeutic chemical, [Bx/TSD: biologic / targeted synthetic treatments, ICS: inhaled corticosteroids, LABA: long-acting beta-2 agonist, LAMA: long-acting muscarinic antagonist, CRSwNP: Chronic Rhinosinusitis with Nasal Polyposis, SA: severe asthma, CSU: Chronic Spontaneous Urticaria, * at least 1 delivery during the study period from April 2021 to March 2022, ** the % could be higher than 100% because at least one inhaled treatment delivered was considered during the study period.
